# Supplementary material
Source: PubMed Central journal article supplement (PMC9170785)
Supplement: mmc7.pdf [file mmc7.pdf]

**A**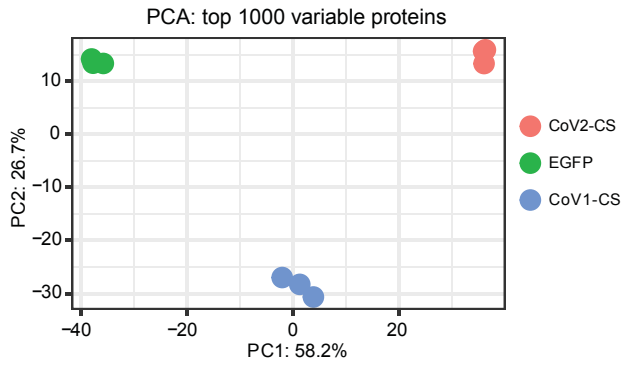**D**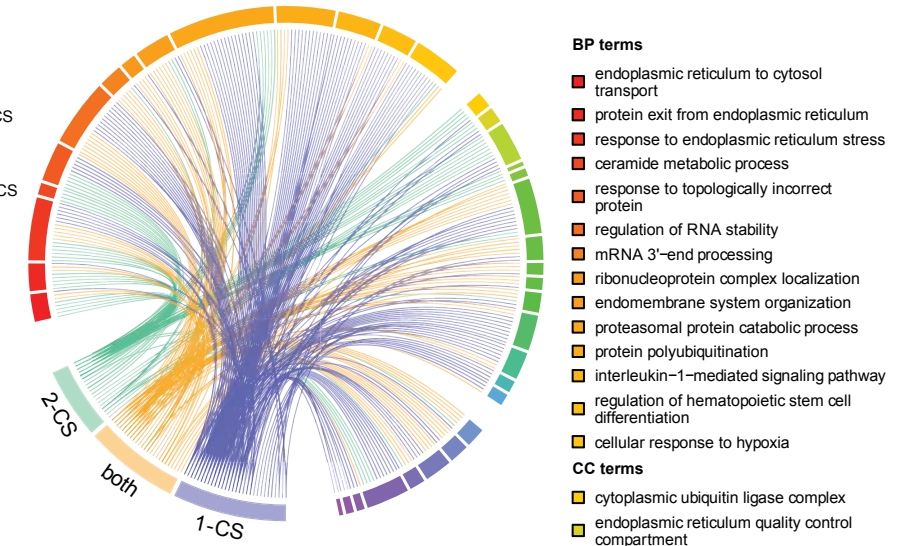**B**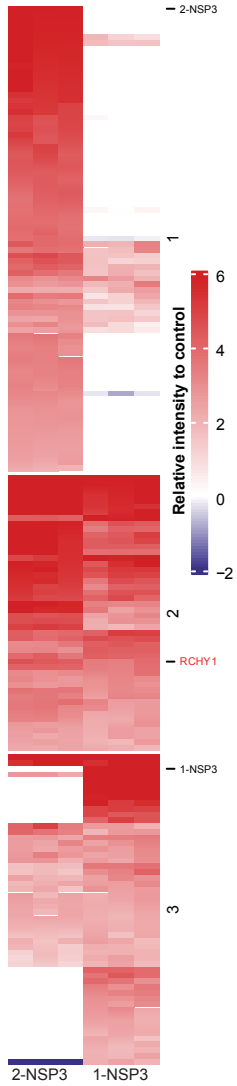**C**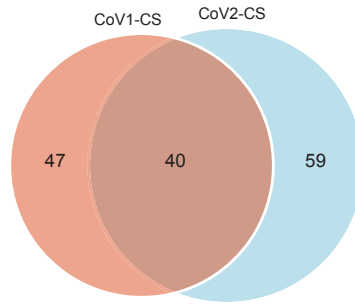**MF terms**

- single-stranded RNA binding
- mRNA 3'-UTR binding
- ubiquitin-like protein ligase activity
- translation regulator activity
- ubiquitin-like protein ligase binding
- threonine-type endopeptidase activity
- polyubiquitin modification-dependent protein binding
- ADP binding
