# Supplementary material
Source: PubMed Central journal article supplement (PMC9170785)

**A**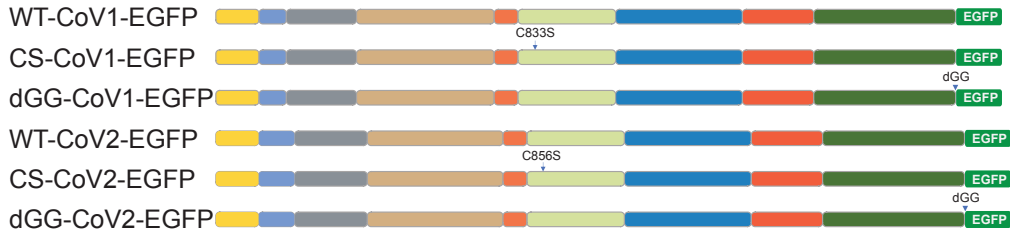**B**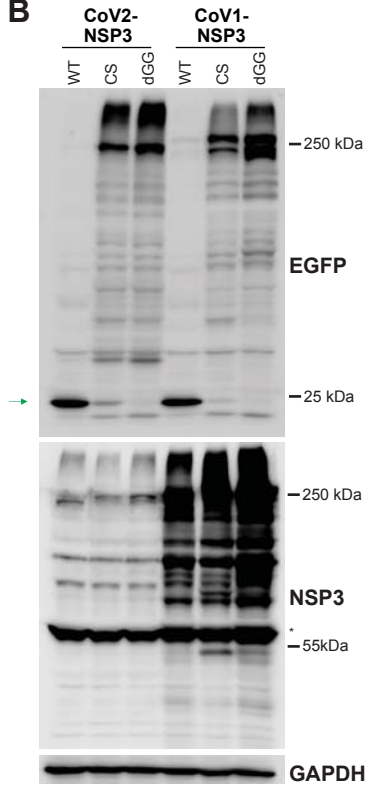**C**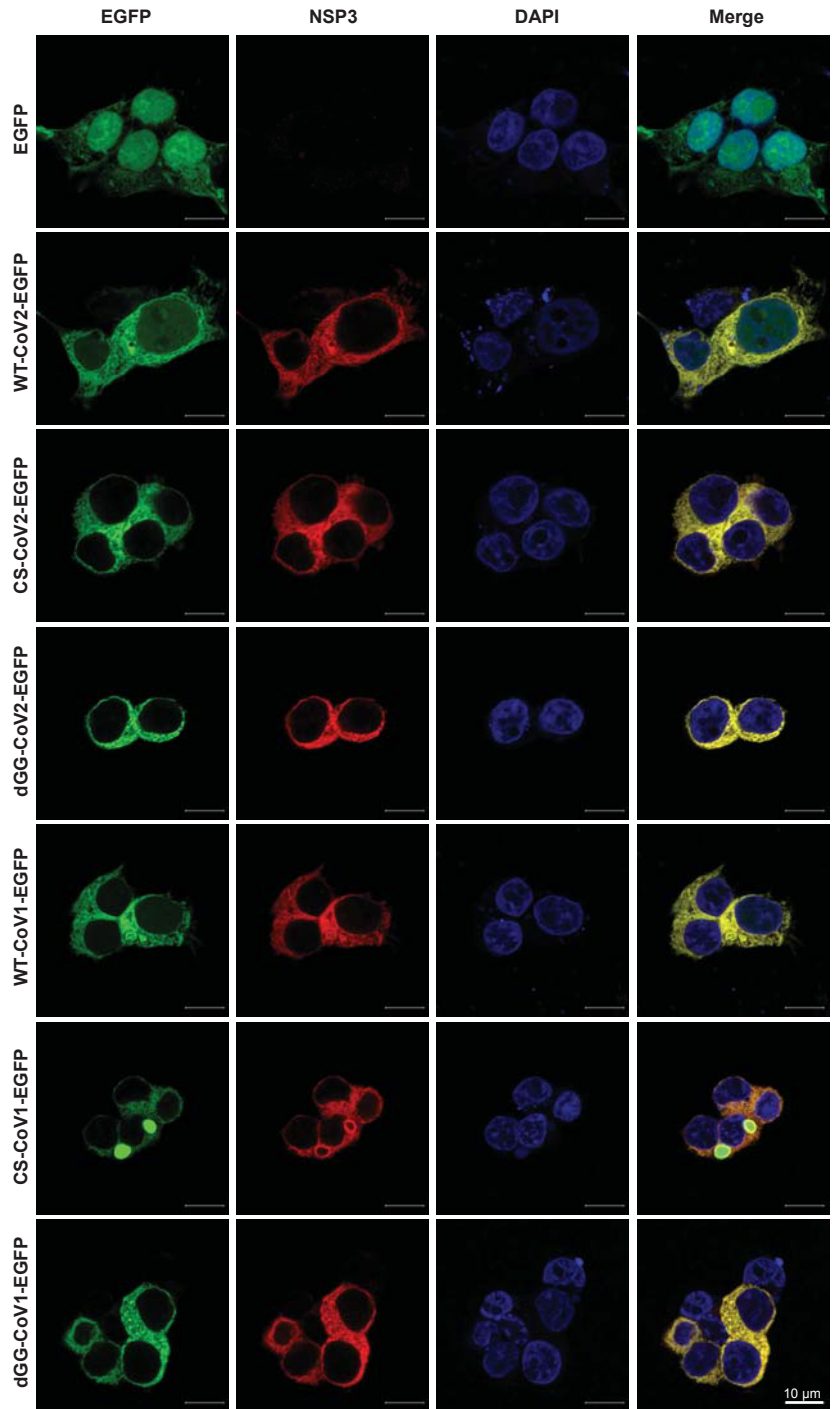

Supplement: mmc1.pdf [file mmc1.pdf]

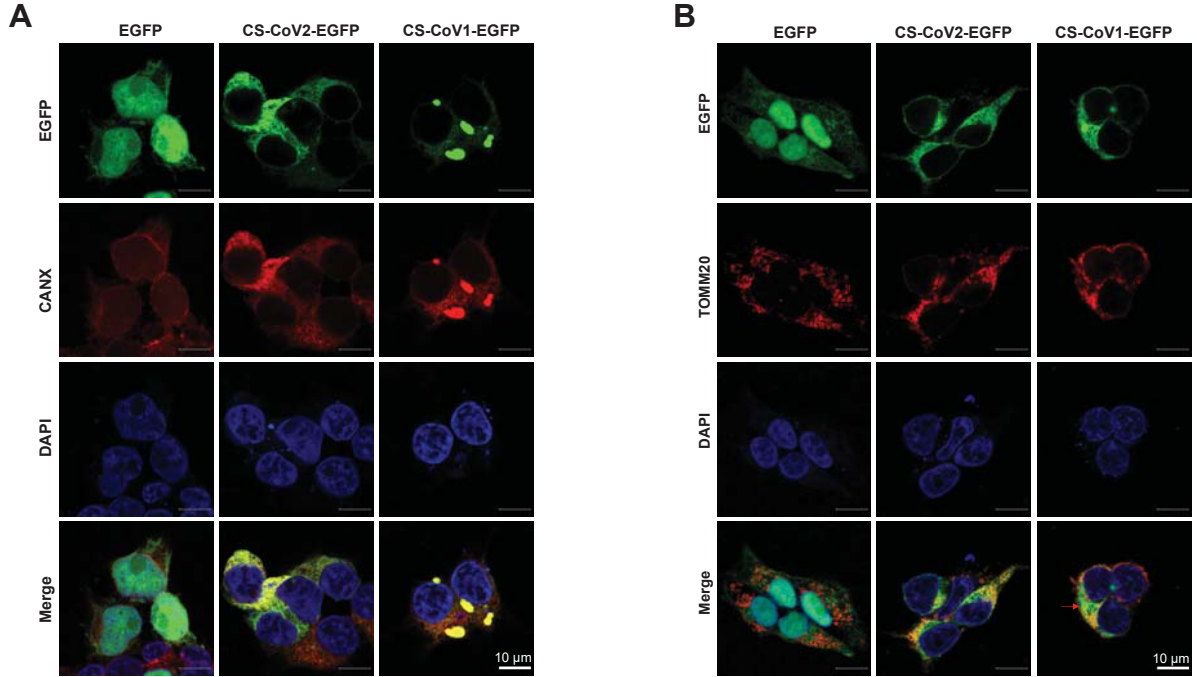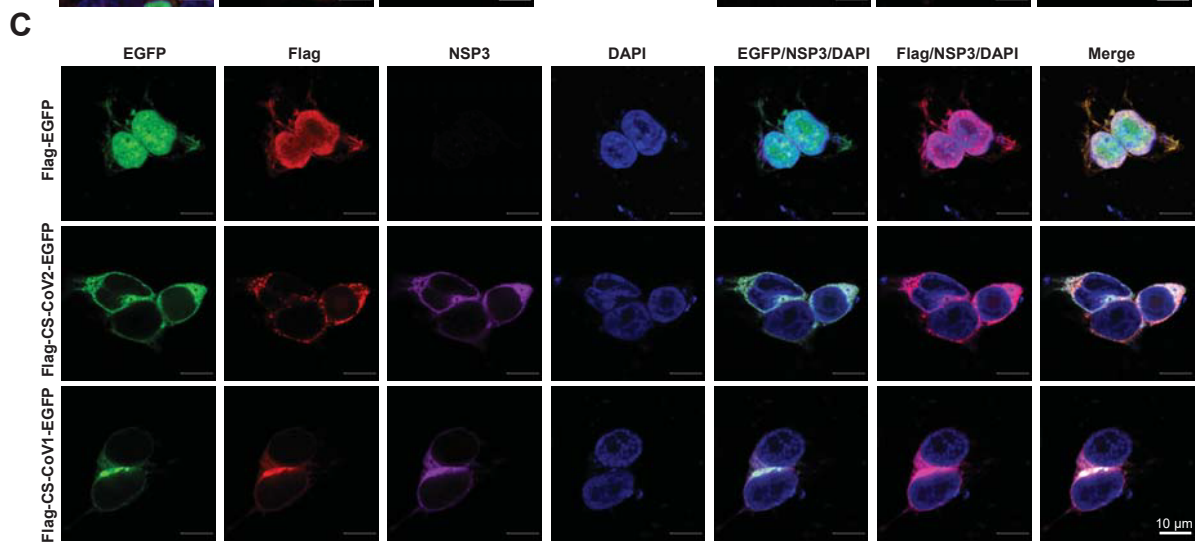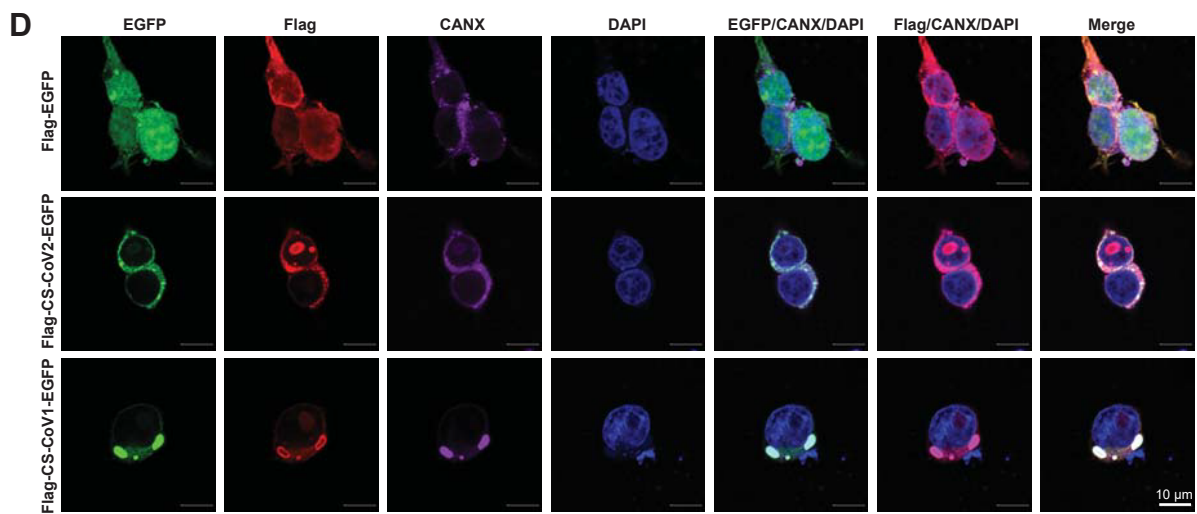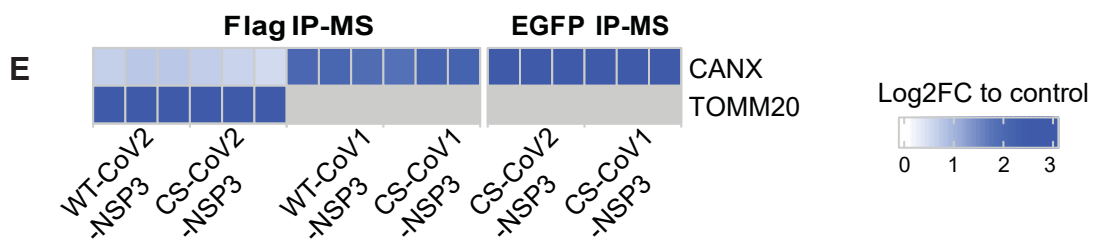

Supplement: mmc2.pdf [file mmc2.pdf]

Flag-CS-NSP3-EGFP

CoV1-(PLpro2)

CoV2-(PLpro1)

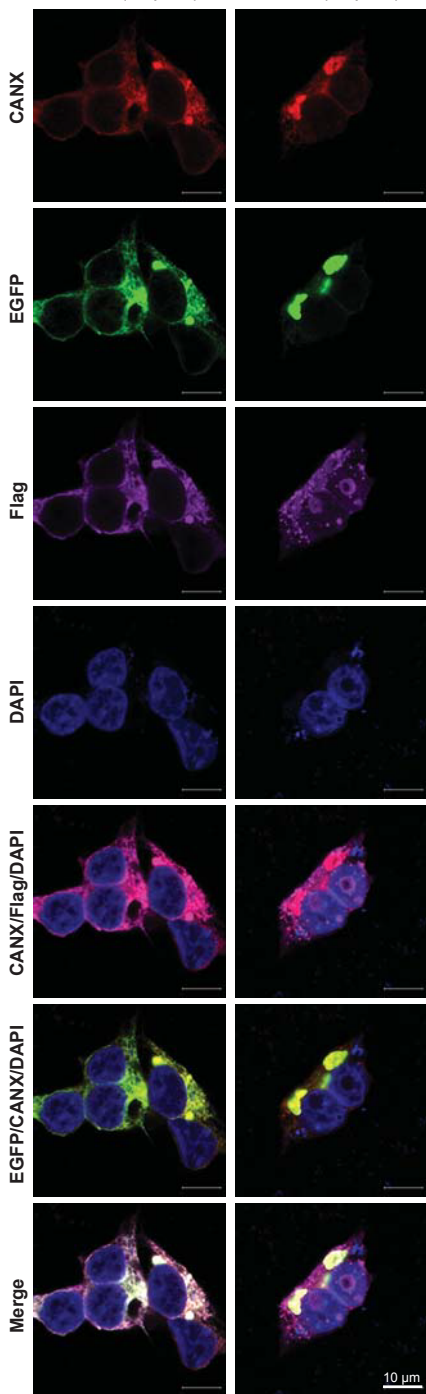

Flag-CS-NSP3-EGFP

CoV1-(PLpro2)

CoV2-(PLpro1)

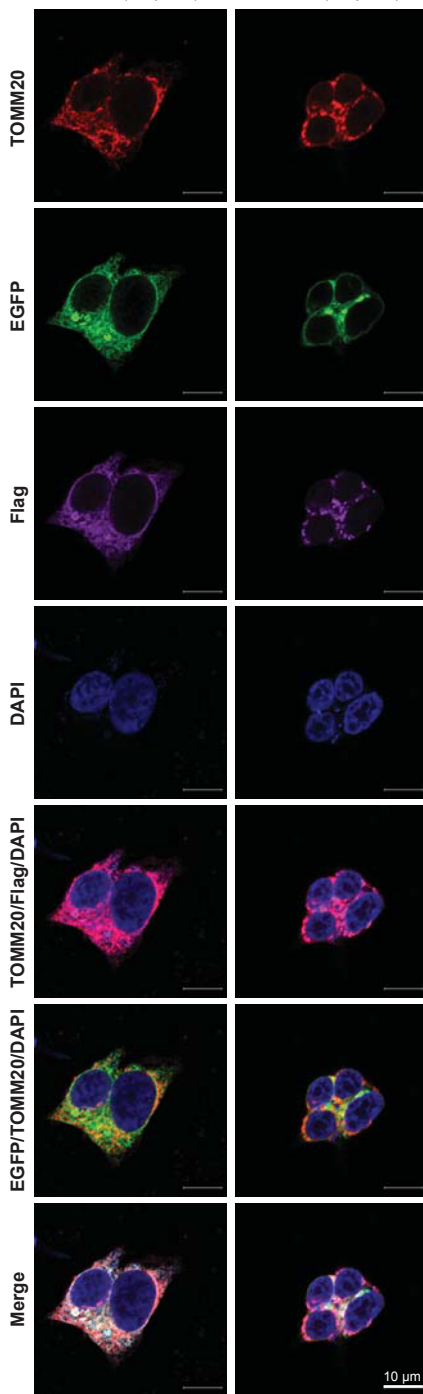

Supplement: mmc3.pdf [file mmc3.pdf]

**A**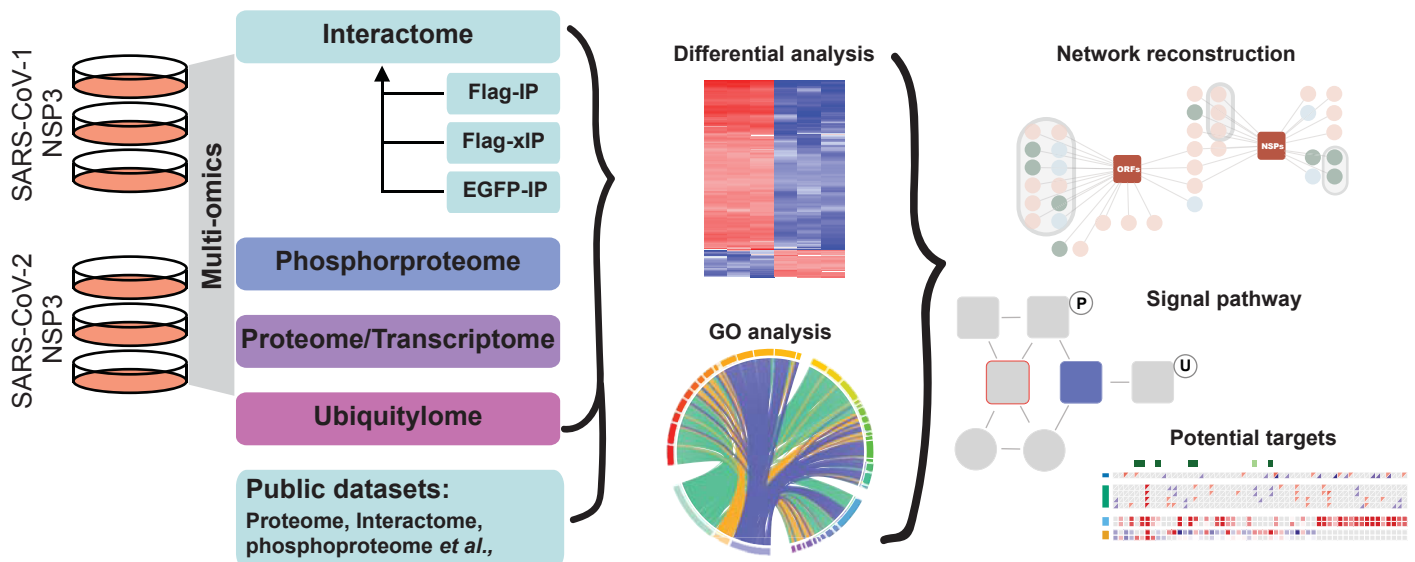**B**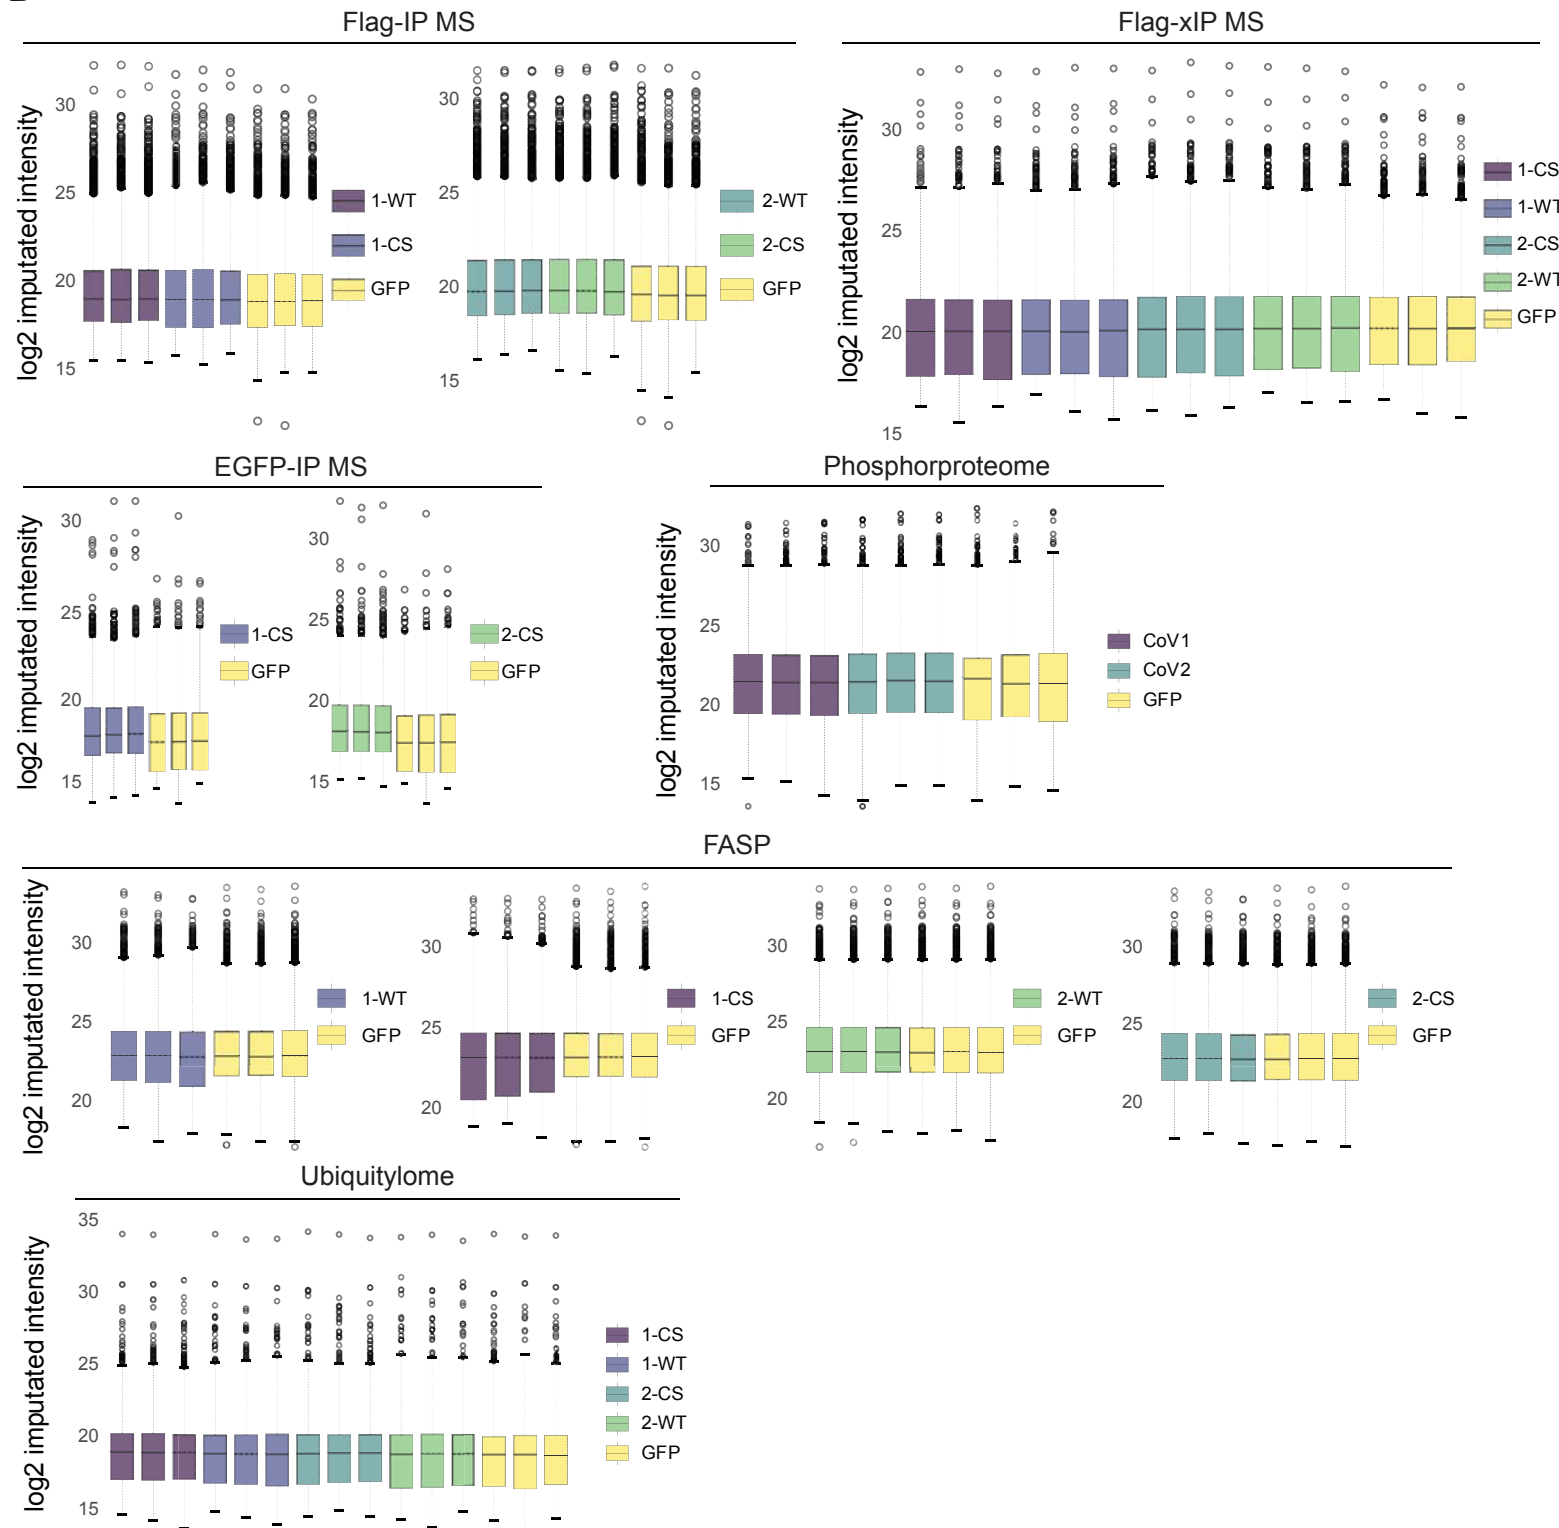

Supplement: mmc4.pdf [file mmc4.pdf]

**A**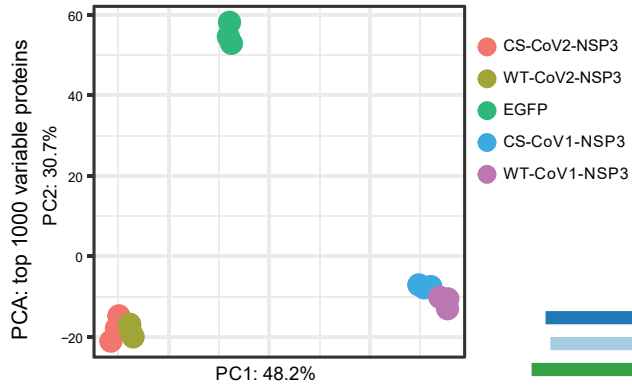**B**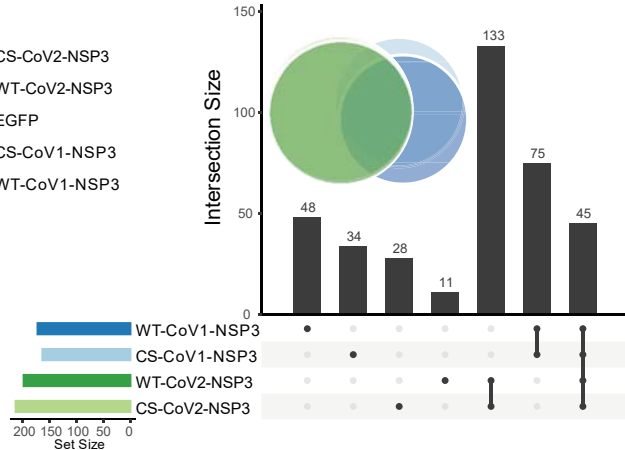**C**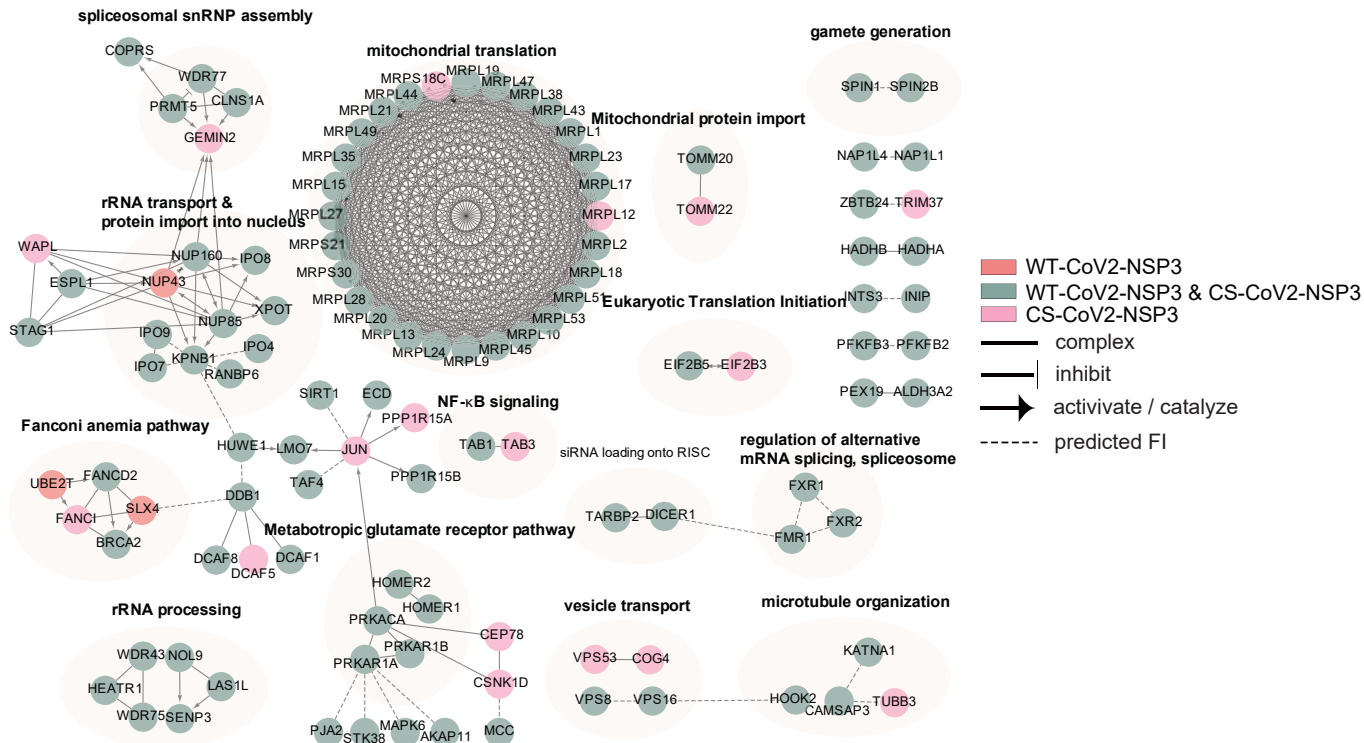**D**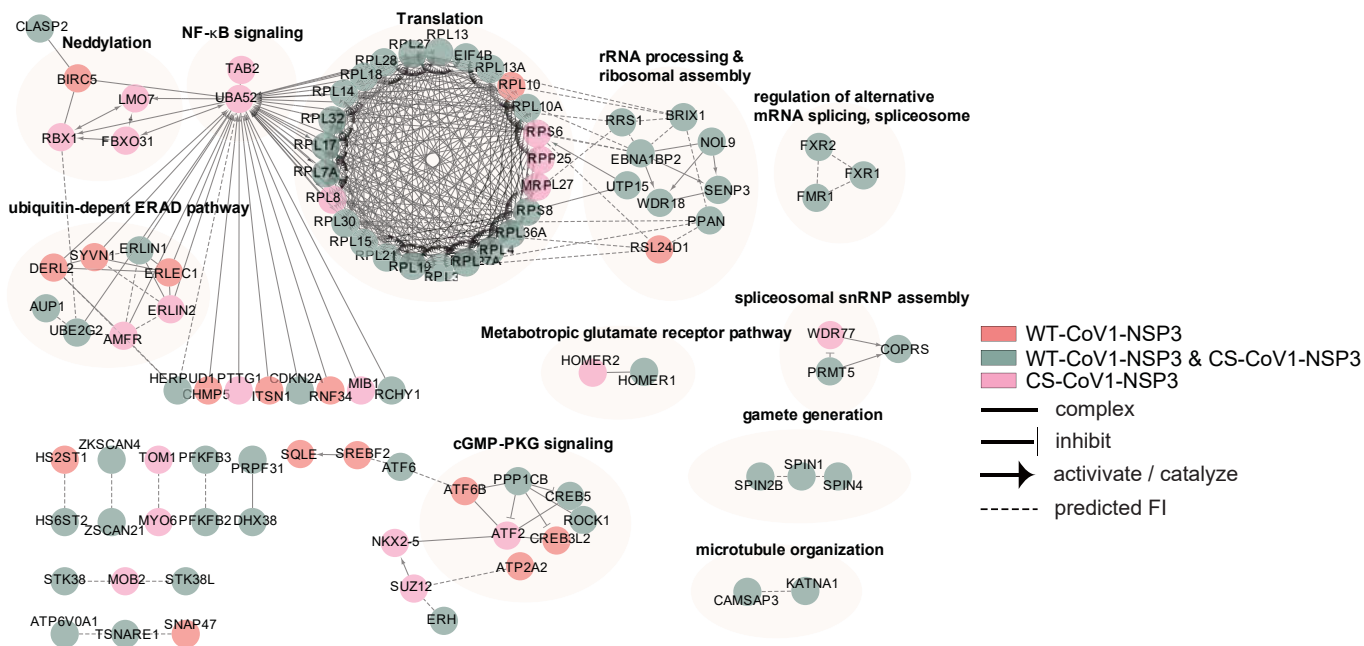

Supplement: mmc5.pdf [file mmc5.pdf]

**A**

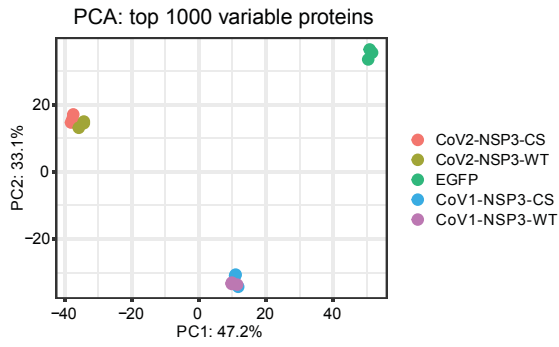

**B**

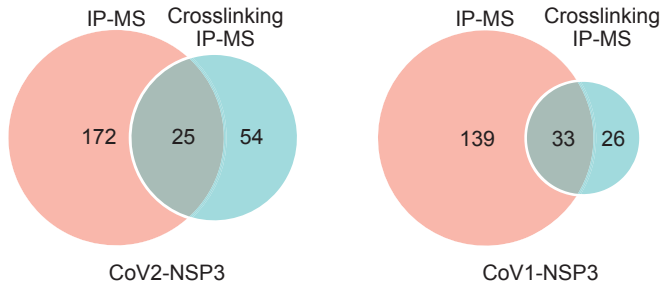

**D**

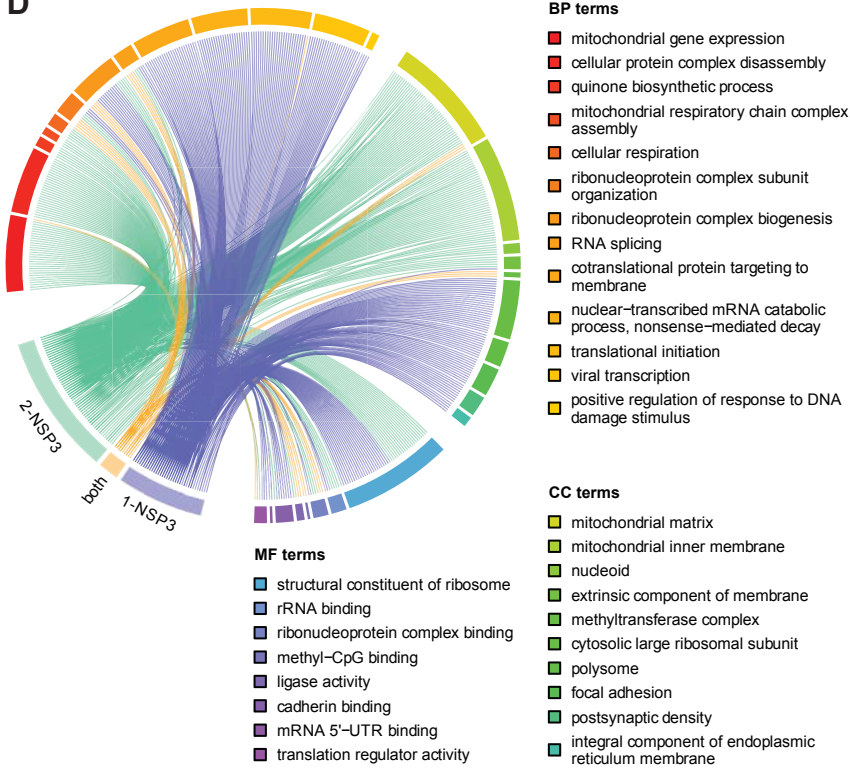

**C**

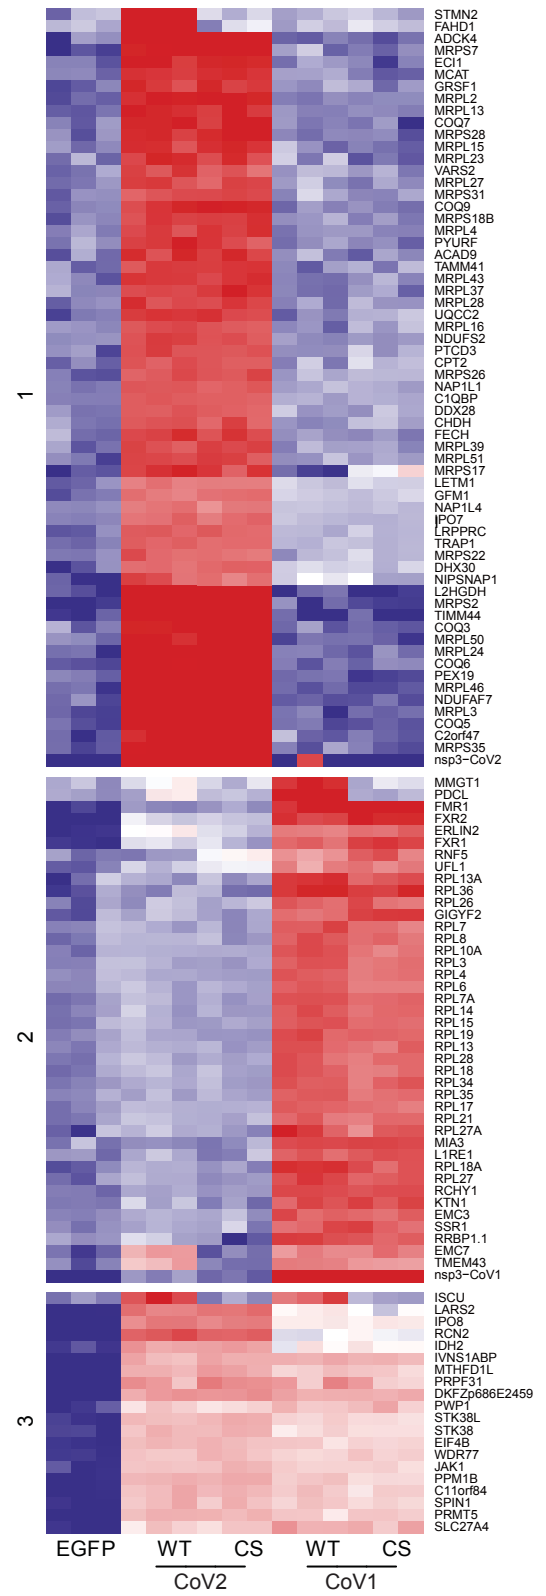

Supplement: mmc6.pdf [file mmc6.pdf]

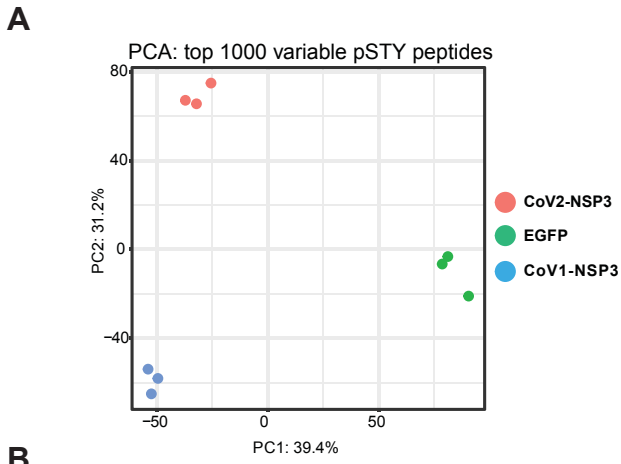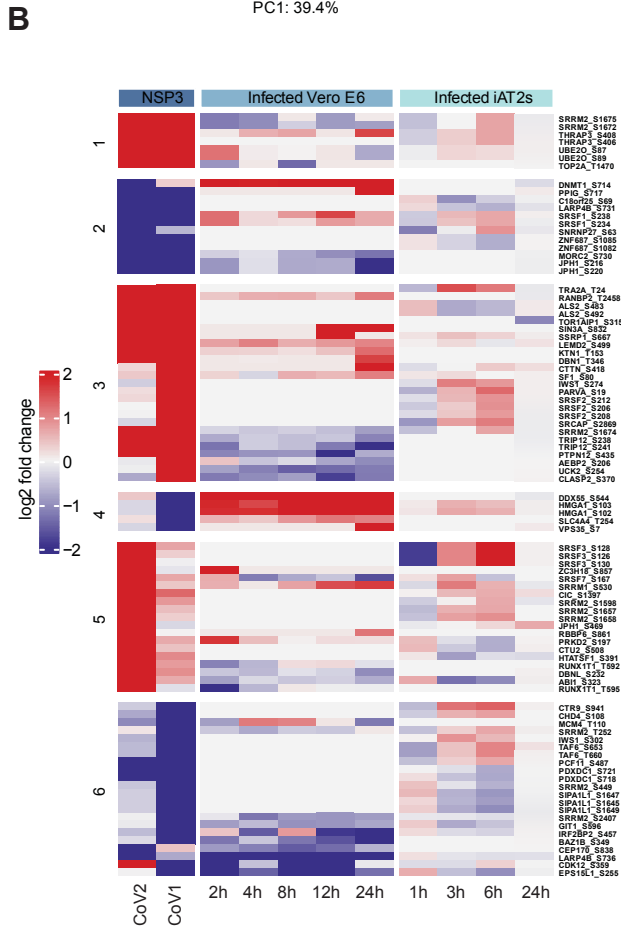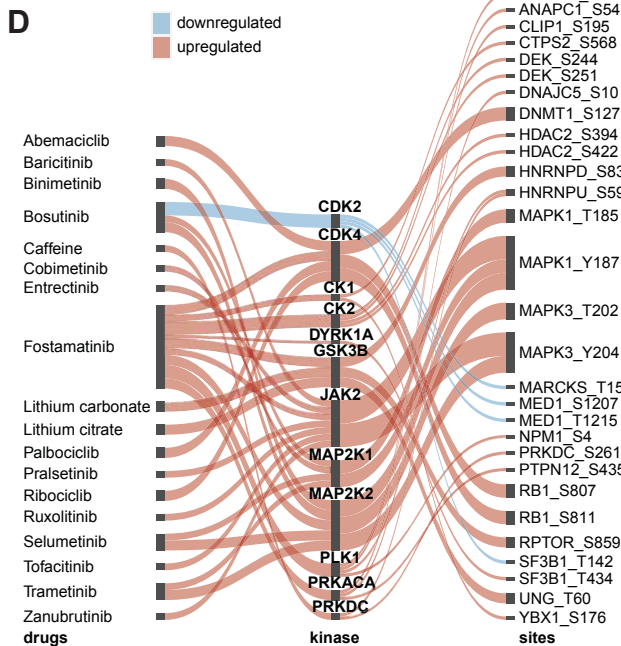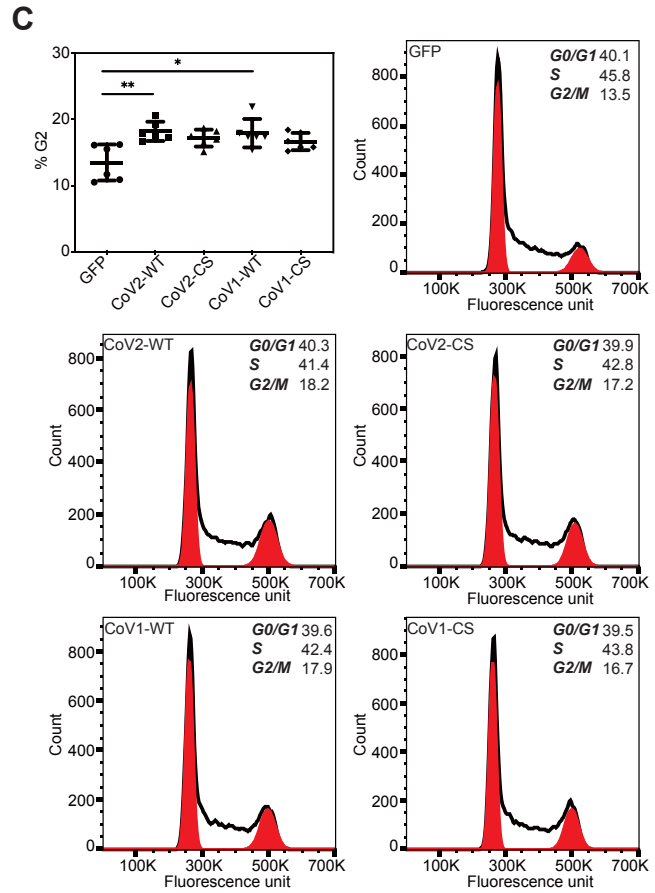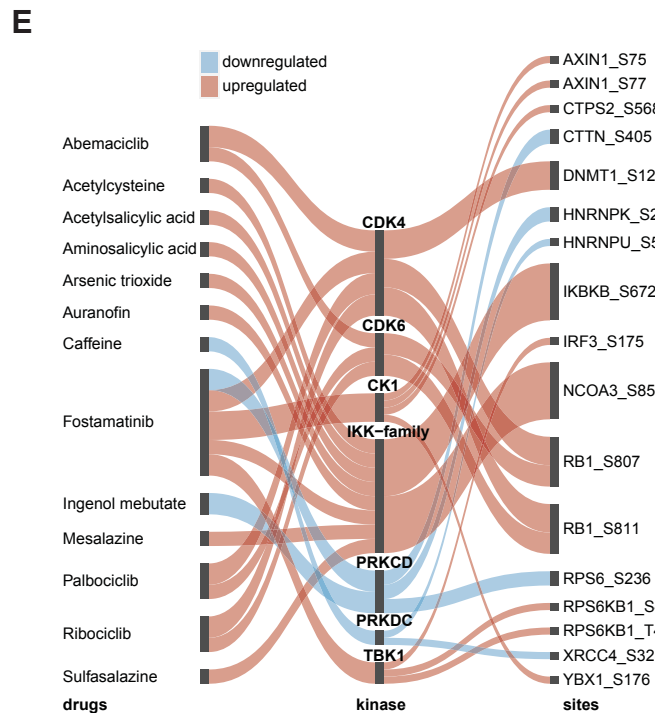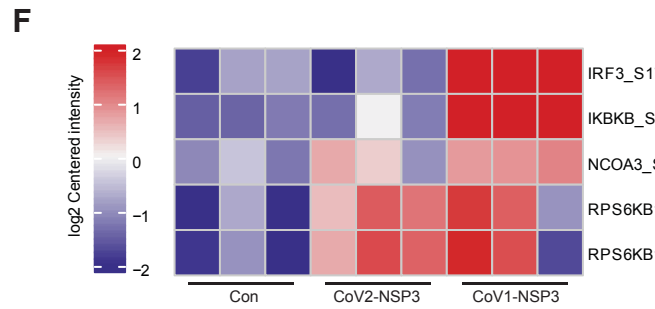

Supplement: mmc8.pdf [file mmc8.pdf]

**A**

PCA plot of top 1000 variable GlyGly (K)Sites

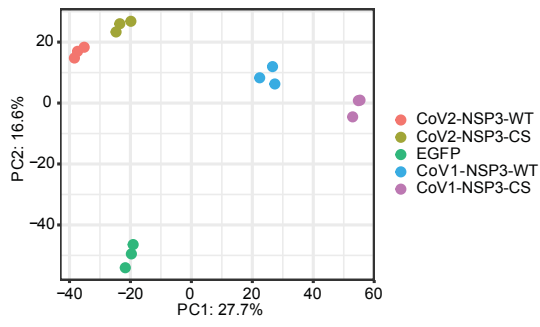**B**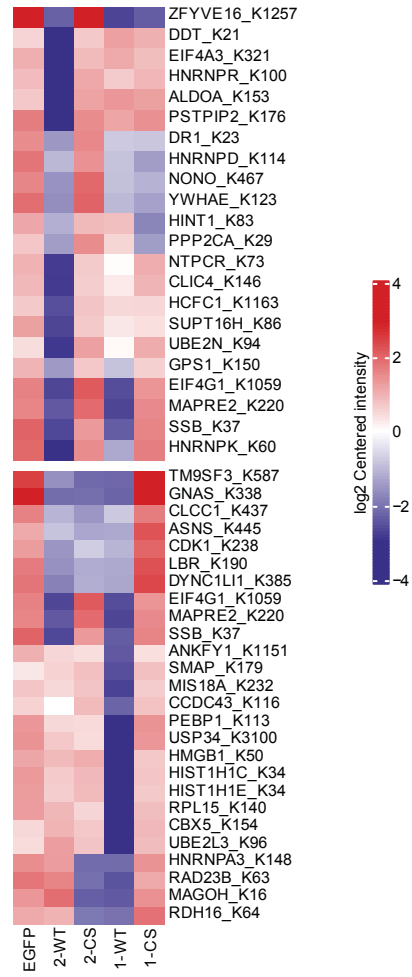

Supplement: mmc9.pdf [file mmc9.pdf]
